# Supplementary material for: Coupling photocatalytic CO2 reduction with benzyl alcohol oxidation to produce benzyl acetate over Cu2O/Cu
Source: Royal Society of Chemistry journal article supplement (doi:10.1039/c8cy00084k), 2018-01-01

**Supporting Information of**  
**Coupling Photocatalytic CO<sub>2</sub> Reduction with Benzyl Alcohol**  
**Oxidation to Produce Benzyl Acetate over Cu<sub>2</sub>O/Cu**

Yi Chen, Mengtao Wang, Yating Ma, Yuanyuan Li, Jingyu Cai, Zhaohui Li\*  
Research Institute of Photocatalysis, State Key Laboratory of Photocatalysis on  
Energy and Environment, College of Chemistry, Fuzhou University, Fuzhou, 350116,  
People's Republic of China

---

\* Author to whom all correspondences should be addressed.

E-mail: [zhaohuili1969@yahoo.com](mailto:zhaohuili1969@yahoo.com)

Fig. S1 TGA curves of  $\text{Cu}_2\text{O}/\text{Cu}$  and  $\text{Cu}_2\text{O}$ .

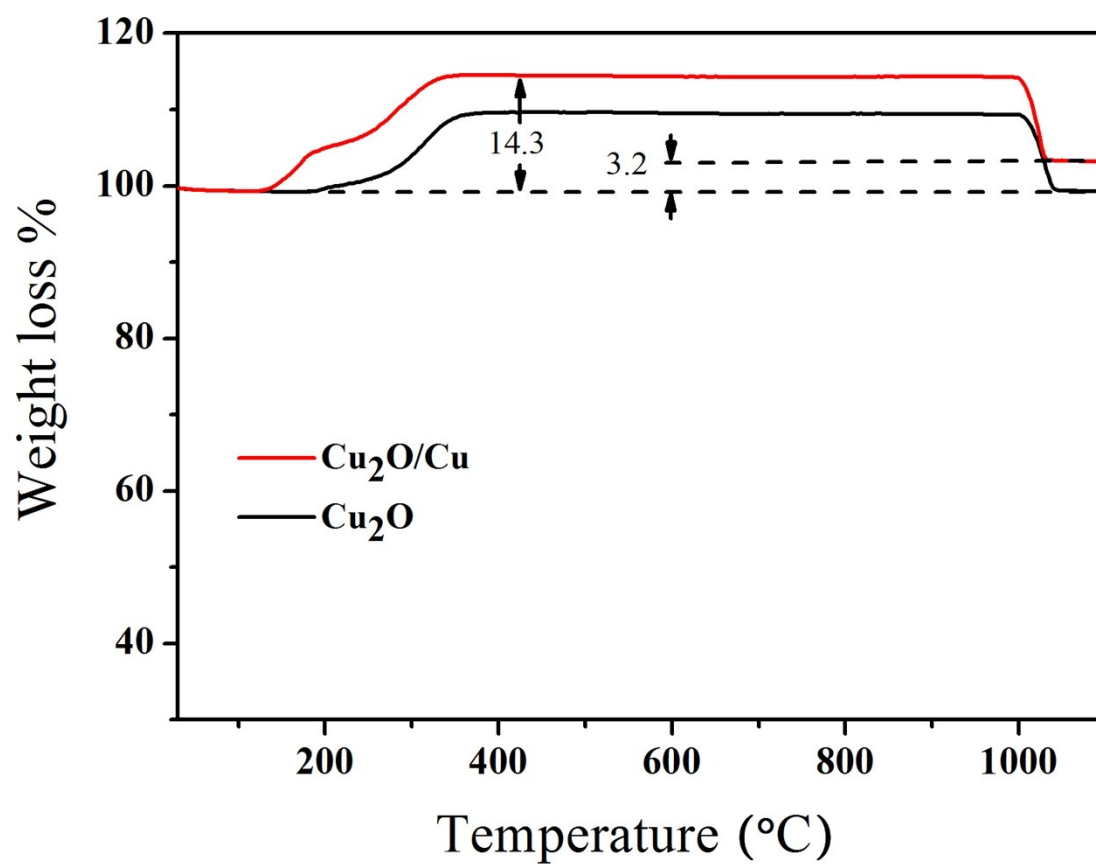

**Fig. S2** SEM image of  $\text{Cu}_2\text{O}$ .

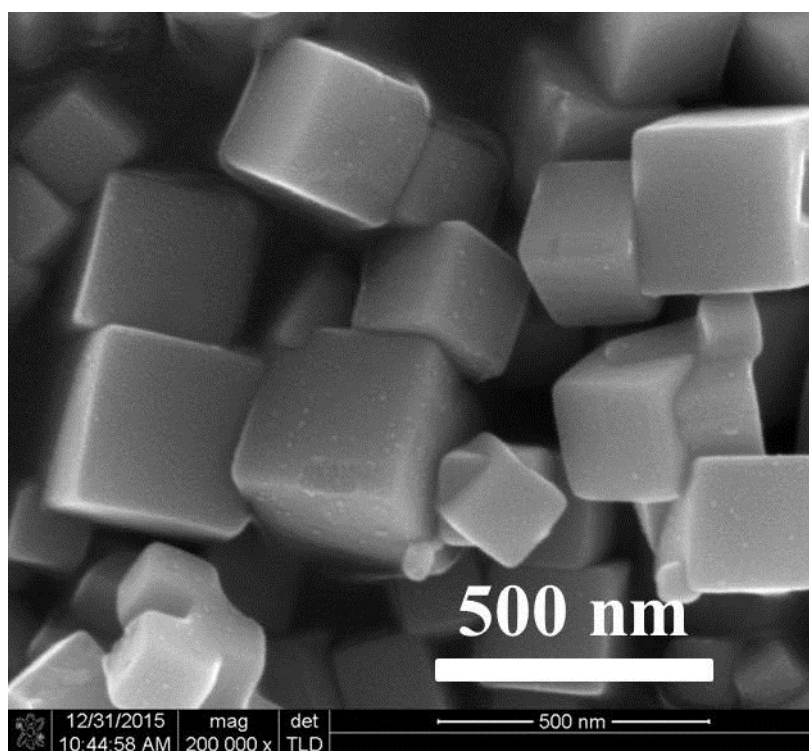

**Fig. S3** N<sub>2</sub> adsorption-desorption isotherms of Cu<sub>2</sub>O and Cu<sub>2</sub>O/Cu.

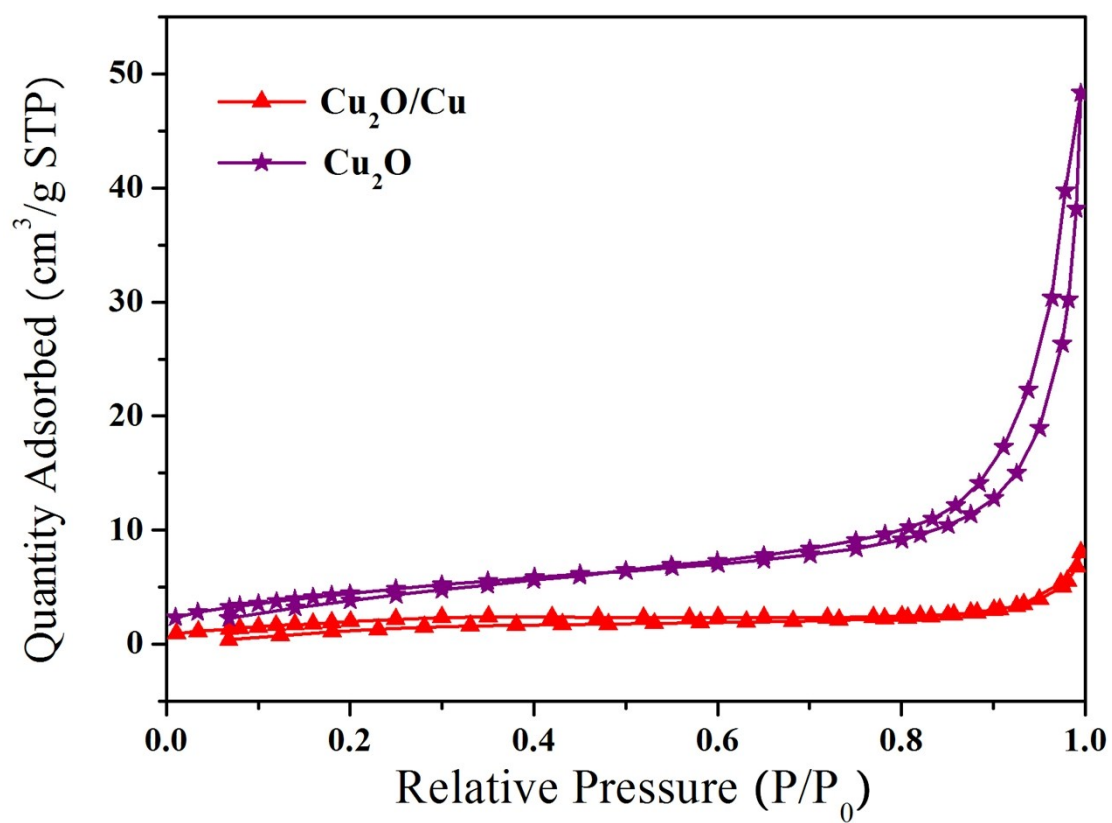

**Fig. S4** (a) GC signals of liquid products and (b) MS signals for product with retention time of 8.5 mins.

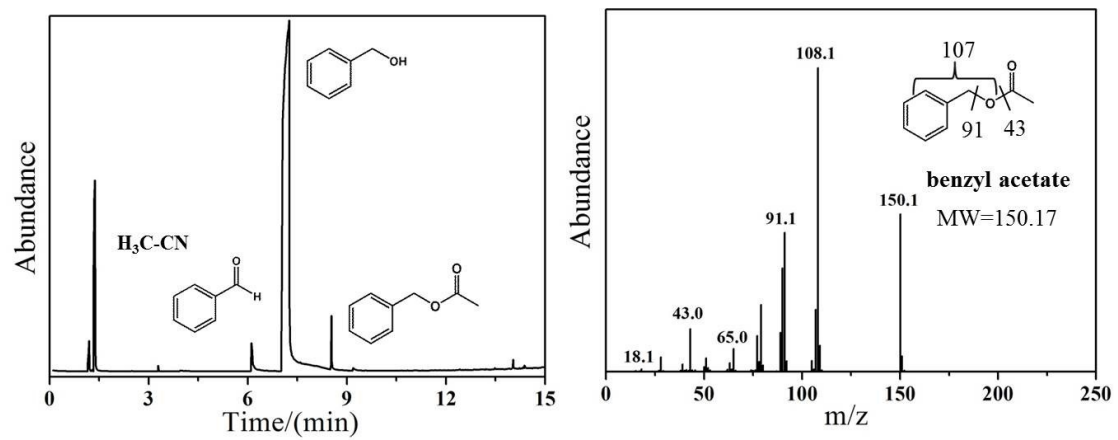

**Fig. S5** In-situ IR spectra of Cu<sub>2</sub>O/Cu under the atmosphere of different concentration of CO<sub>2</sub>.

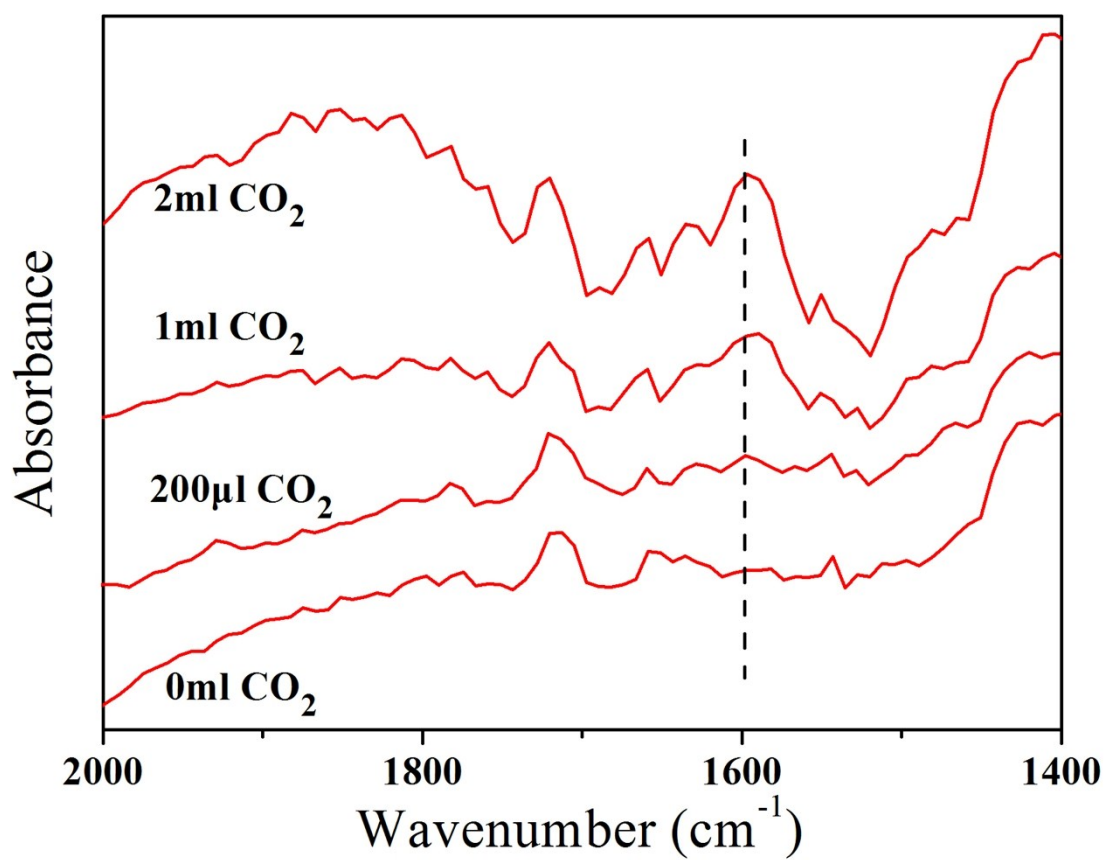

Supplement: c8cy00084k1.pdf [file c8cy00084k1.pdf]
